# Supplementary material for: Multi-molecule reaction of serum albumin can occur through thiol-yne coupling
Source: Royal Society of Chemistry journal article supplement (doi:10.1039/c1cc14402b), 2011-01-01
Supplement: c1cc14402b.pdf [file c1cc14402b.pdf]

## Multi-molecule reaction of serum albumin can occur through thiol-yne coupling

Mauro Lo Conte,<sup>a</sup> Samuele Staderini,<sup>a</sup> Alberto Marra,<sup>a</sup> Macarena Sánchez-Navarro,<sup>b</sup> Benjamin G. Davis<sup>\*b</sup> and Alessandro Dondoni <sup>\*a</sup>

<sup>a</sup> *Dipartimento di Chimica, Laboratorio di Chimica Organica, Università di Ferrara, Via L. Borsari 46, 44100 Ferrara, Italy.*

<sup>b</sup> *Department of Chemistry, University of Oxford, Chemistry Research Laboratory, Mansfield Road, Oxford OX1 3TA, UK.*

### Supporting Information

| Table of contents                                                                    | Page |
|--------------------------------------------------------------------------------------|------|
| General Experimental Section                                                         | S2   |
| Synthesis and physical data of <b>1</b>                                              | S3   |
| Synthesis and physical data of <b>5</b>                                              | S3   |
| Synthesis and physical data of <b>8</b>                                              | S4   |
| Synthesis of <b>12</b>                                                               | S4   |
| Synthesis of <b>13</b>                                                               | S4   |
| Synthesis of <b>14</b>                                                               | S5   |
| Figure S1                                                                            | S5   |
| Figure S2                                                                            | S5   |
| Maldi spectra of BSA derivatives <b>11-14</b>                                        | S6   |
| Tryptic digestion and LC ESI-QTOF MS analysis of derivatives <b>13</b> and <b>14</b> | S7   |
| References                                                                           | S8   |

**General Experimental Section.** Flash column chromatography<sup>29</sup> was performed on silica gel 60 (40-63  $\mu\text{m}$ ). Optical rotations were measured at  $20 \pm 2$  °C in the stated solvent;  $[\alpha]_{\text{D}}$  values are given in  $\text{deg}\cdot\text{mL}\cdot\text{g}^{-1}\cdot\text{dm}^{-1}$ .  $^1\text{H}$  NMR (300 and 400 MHz) and  $^{13}\text{C}$  NMR spectra (75 MHz) were recorded from  $\text{CDCl}_3$  solutions at room temperature unless otherwise specified. Peak assignments were aided by  $^1\text{H}$ - $^1\text{H}$  COSY and gradient-HMQC experiments. In the  $^1\text{H}$  NMR spectra reported below, the  $n$  and  $m$  values quoted in geminal or vicinal proton-proton coupling constants  $J_{n,m}$  refer to the number of the corresponding sugar protons.

For accurate mass measurements the compounds were analyzed in positive ion mode by electrospray hybrid quadrupole orthogonal acceleration time-of-flight mass spectrometer (Q-TOF) fitted with a Z-spray electrospray ion source. The capillary source voltage and the cone voltage were set at 3500 V and 35 V, respectively; the source temperature was kept at 80 °C; nitrogen was used as a drying gas at a flow rate of ca. 50 L/h. The time-of-flight analyzer was externally calibrated with NaI from  $m/z$  300 to 2000 to yield an accuracy near to 5 ppm. When necessary an internal lock mass was used to further increase the mass accuracy. Accurate mass data were collected by directly infusing samples (10 pmol/ $\mu\text{L}$  in 1:1  $\text{CH}_3\text{CN}$ - $\text{H}_2\text{O}$  containing 10 mM ammonium formate) into the system at a flow rate of 5  $\mu\text{L}/\text{min}$ . The monoisotopic masses were calculated according to the reported<sup>30</sup> atomic weights of the elements.

MALDI MS analysis was conducted on a Water MALDI Micro MX spectrometer with TOF detection, in positive linear mode. Unmodified protein was used as a lock mass calibrant. Data were processed using Mass Lynx 4.1. Mass spectra were smoothed with Savitzky-Golay smoothing prior to dispersity analysis. A 2  $\mu\text{L}$  sample of the protein solution (1mg/mL) was diluted to 20  $\mu\text{L}$  with 0.1% TFA in  $\text{H}_2\text{O}$ . This solution was mixed in a 1:10 ratio (v/v) with a solution of sinapinic acid (10 mg/mL in 2:3  $\text{H}_2\text{O}/\text{CH}_3\text{CN}$  containing 0.1% TFA). 2.5  $\mu\text{L}$  of this matrix/sample solution, was spotted onto a steel target and allowed to co-crystallize at r. t. over 3 h.

The commercially available photoinitiator DPAP (Aldrich 19611-8) and glutathione **6** were used without further purification. The known *N*-Boc cysteine ethyl ester **2**<sup>31</sup> and the fluorescein thiol **4**<sup>32</sup> were prepared as described.

For each sample of protein 1  $\mu\text{L}$  of solution ( $\sim 1\text{mg mL}^{-1}$ ) was analyzed by LC ESI-QTOF MS/MS using a Waters SYNAPT HDMS system with a Waters nano-acquity UPLC system. Chromatography comprises mobile phase a 100% water with 0.1% formic acid and mobile phase B 100% acetonitrile with 0.1% formic acid.

A 90 min chromatographic gradient was used at 0.4 $\mu\text{L}/\text{min}$  to give a linear increase from 5% B to 40% B in 75 min, from 40% B to 95% B in 5 min, from 95% B to 1% B in 5 min and the column was conditioned again at 1% B for 8 min.

A Water BEHC18 75uM x 100mm trap column was used with an analytical Waters BEH130 C-18 (1.7 particle size) nanoAcquity UPLC column. Other mass spec parameters were as follows : Nanolockspray using Reserpine's  $^{13}\text{C}$  peak as a lockmass; Capillary = 2.65 kV; Cone = 35 V.

**Synthesis of propargyl 1-thio- $\beta$ -D-glucopyranoside (1).** A solution of known<sup>33</sup> propargyl 2,3,4,6-tetra-*O*-acetyl-1-thio- $\beta$ -D-glucopyranoside (200 mg, 0.50 mmol) in MeOH (5 mL), Et<sub>3</sub>N (1 mL), and H<sub>2</sub>O (1 mL) was kept at r. t. for 14 h and then concentrated. The residue was eluted from a C-18 silica gel cartridge with H<sub>2</sub>O to give **1** (107 mg, 92%) as a colorless syrup;  $[\alpha]_{\text{D}} = -86.2$  (*c* 0.7, H<sub>2</sub>O).  $^1\text{H}$  NMR (300 MHz, D<sub>2</sub>O):  $\delta$  4.59 (d, 1H,  $J_{1,2} = 9.8$  Hz, H-1), 3.76 (dd, 1H,  $J_{5,6a} = 2.3$ ,  $J_{6a,6b} = 12.5$  Hz, H-6a), 3.57 (dd, 1H,  $J_{5,6b} = 5.8$  Hz, H-6b), 3.47 (dd, 1H,  $J = 2.2$ , 17.0 Hz, 1 H of CH<sub>2</sub>S), 3.40-3.24 (m, 5H), 2.52 (dd, 1H,  $J = 2.2$ , 2.7 Hz, C $\equiv$ CH).  $^{13}\text{C}$  NMR (75 MHz, D<sub>2</sub>O):  $\delta$  84.1 (CH), 80.2 (C), 79.8 (CH), 77.1 (CH), 72.1 (CH), 71.9 (CH), 69.4 (CH), 60.7 (CH<sub>2</sub>), 16.9 (CH<sub>2</sub>). HRMS (ESI/Q-TOF) *m/z* calcd for C<sub>9</sub>H<sub>14</sub>NaO<sub>5</sub>S (M+Na)<sup>+</sup> 257.0460, found 257.0475.

**Synthesis of 5.** The reaction was carried out in a glass vial, located 2.5 cm away from the household UVA lamp apparatus equipped with four 15 W tubes (1.5 x 27 cm each). A solution of cysteine **2** (40 mg, 0.16 mmol), propargyl thioglucoside **1** (150 mg, 0.64 mmol), and 2,2-dimethoxy-2-phenylacetophenone (DPAP, 4.1 mg, 16  $\mu\text{mol}$ ) in MeOH (400  $\mu\text{L}$ ) was irradiated at r. t. for 10 min under magnetic stirring and then concentrated. The residue was eluted from a column of silica gel with AcOEt-CH<sub>2</sub>Cl<sub>2</sub> (from 1.5:1 to 2:1) to give syrupy **3** (24 mg, 31%) as a ca. 1:1 *E/Z* mixture. Eluted second was unmodified **1** (112 mg, 75%).  $^1\text{H}$  NMR (300 MHz, CD<sub>3</sub>OD) selected data:  $\delta$  6.23 (bd, 0.4H,  $J = 15.0$  Hz, CH=CHS), 6.18 (d, 0.6H,  $J = 9.4$  Hz, CH=CHS), 5.78-5.64 (m, 1H, CH=CHS), 4.38 (d, 0.6H,  $J = 9.8$  Hz, H-1), 4.36 (d, 0.4H,  $J = 9.8$  Hz, H-1), 4.22 (q, 2H,  $J = 7.0$  Hz, CH<sub>2</sub>CH<sub>3</sub>), 1.48 (s, 9H, *t*-Bu), 1.31 (t, 3H,  $J = 7.0$  Hz, CH<sub>2</sub>CH<sub>3</sub>). HRMS (ESI/Q-TOF) *m/z* calcd for C<sub>19</sub>H<sub>33</sub>NNaO<sub>9</sub>S<sub>2</sub> (M+Na)<sup>+</sup> 506.1494, found 506.1511.

A solution of **3** (24 mg, 49.6  $\mu\text{mol}$ ), **4** (93 mg, 0.20 mmol), and DPAP (5.1 mg, 20  $\mu\text{mol}$ ) in DMF (350  $\mu\text{L}$ ) was irradiated at r. t. for 30 min under magnetic stirring and then concentrated. The residue was eluted from a column of Sephadex LH-20 (1.5 x 40 cm) with MeOH to give **5** (16.5 mg, 35%) as a syrup.  $^1\text{H}$  NMR (400 MHz, CD<sub>3</sub>OD) selected data:  $\delta$  8.10 (bs, 1H), 7.79-7.74 (m, 1H), 7.18 (d, 1H,  $J = 8.2$  Hz), 6.76 (bd, 2H,  $J = 8.4$  Hz), 6.65 (d, 2H,  $J = 2.6$  Hz), 6.57 (dd, 2H,  $J = 2.6$ , 8.4 Hz), 4.52 (d, 1H,  $J = 10.0$  Hz, H-1), 4.18 (q, 2H,  $J = 7.0$  Hz, CH<sub>2</sub>CH<sub>3</sub>), 1.42 (s, 9H, *t*-Bu).  $^{13}\text{C}$  NMR (100 MHz, CD<sub>3</sub>OD):  $\delta$  182.6, 172.8, 171.4, 154.8, 130.7, 126.5, 114.7, 112.1, 103.5, 88.3, 87.0, 82.0, 80.8, 79.6, 74.6, 74.5, 62.9, 62.6, 55.5, 45.3, 38.1, 35.6, 35.4, 31.2, 28.7, 14.6. HRMS (ESI/Q-TOF) *m/z* calcd for C<sub>42</sub>H<sub>52</sub>N<sub>3</sub>O<sub>14</sub>S<sub>4</sub> (M+H)<sup>+</sup> 950.2332, found 950.2298.

**Synthesis of 8.** To a solution of glutathione **6** (23 mg, 75  $\mu\text{mol}$ ) and **1** (70 mg, 0.30 mmol) in  $\text{H}_2\text{O}$  (200  $\mu\text{L}$ ) was added a solution of DPAP (2 mg, 7.5  $\mu\text{mol}$ ) in MeOH (100  $\mu\text{L}$ ). The solution was irradiated at r. t. for 5 min under magnetic stirring and then eluted from a column of Sephadex LH-20 with 1:1  $\text{H}_2\text{O}$ -MeOH to give syrupy **7** (26 mg, 64%) as a ca. 1:1 *E/Z* mixture. Eluted second was unmodified **1** (56 mg, 80%).  $^1\text{H}$  NMR (300 MHz,  $\text{D}_2\text{O}$ ) selected data:  $\delta$  6.12-6.04 (m, 1H,  $\text{CH}=\text{CHS}$ ), 5.72-5.56 (m, 1H,  $\text{CH}=\text{CHS}$ ), 4.31 (d, 0.5H,  $J = 10.0$  Hz, H-1), 4.29 (d, 0.5H,  $J = 10.0$  Hz, H-1), 2.44-2.35 (m, 2H), 2.05-1.96 (m, 2H). HRMS (ESI/Q-TOF)  $m/z$  calcd for  $\text{C}_{19}\text{H}_{32}\text{N}_3\text{O}_{11}\text{S}_2$  ( $\text{M}+\text{H}$ ) $^+$  542.1478, found 542.1501.

A solution of **7** (26 mg, 48  $\mu\text{mol}$ ), **4** (86 mg, 0.19 mmol), and DPAP (4.9 mg, 19  $\mu\text{mol}$ ) in DMF (350  $\mu\text{L}$ ) was irradiated at r. t. for 30 min under magnetic stirring and then concentrated. The residue was eluted from a column of Sephadex LH-20 (1.5 x 40 cm) with MeOH to give **8** (7.2 mg, 15%) as a syrup.  $^1\text{H}$  NMR (400 MHz,  $\text{CD}_3\text{OD}$ ) selected data:  $\delta$  8.10 (bs, 1H), 7.84-7.80 (m, 1H), 7.18-7.13 (m, 1H), 6.69-6.62 (m, 3H), 6.57-6.53 (m, 2H), 4.52 (d, 0.5H,  $J = 10.0$  Hz, H-1), 4.50 (d, 0.5H,  $J = 10.0$  Hz, H-1). HRMS (ESI/Q-TOF)  $m/z$  calcd for  $\text{C}_{42}\text{H}_{50}\text{N}_5\text{O}_{16}\text{S}_4$  ( $\text{M}+\text{H}$ ) $^+$  1008.2135, found 1008.2098.

**Synthesis of 12.** To a solution of commercial BSA (30 mg, 0.46  $\mu\text{mol}$ ) in 20 mM phosphate buffer at pH 7.4 (3.0 mL) was slowly added a solution of **1** (3.5 mg, 15.0  $\mu\text{mol}$ ) and DPAP (0.3 mg, 1.3  $\mu\text{mol}$ ) in DMSO (150  $\mu\text{L}$ ). The mixture was irradiated at r. t. for 5 min under magnetic stirring, then filtered twice through Ultrafree-MC microcentrifuge filter (nominal MW limit of 5,000 Da) for 30 min at 5,000 rpm. To a solution of the protein glycoconjugate **10** in 20 mM phosphate buffer at pH 7.4 (3.0 mL) was added a solution of **4** (34 mg, 73  $\mu\text{mol}$ ) and DPAP (1.9 mg, 7.3  $\mu\text{mol}$ ) in DMSO (150  $\mu\text{L}$ ). The mixture was irradiated at r. t. for 10 min under magnetic stirring, then filtered twice through Ultrafree-MC microcentrifuge filter (nominal MW limit of 5,000 Da) for 30 min at 5,000 rpm to give **12**.

**Synthesis of 13.** To a solution of commercially available BSA (0.5 mg, 7.5 nmol) in 20 mM phosphate buffer at pH 7.4 (125  $\mu\text{L}$ ) was slowly added a solution of cyclooctyne **9** (0.2 mg, 64.0  $\mu\text{mol}$ ) in DMSO (4  $\mu\text{L}$ ) and DPAP (1  $\mu\text{L}$  of a 0.025 M solution in DMSO, 25.0 nmol). The mixture was irradiated at r. t. for 50 min, then filtered twice through Ultrafree-MC microcentrifuge filter (nominal MW limit of 10,000 Da) for 10 min at 5,000 rpm. To a solution of the protein conjugate **11** in 20 mM phosphate buffer at pH 7.4 (125  $\mu\text{L}$ ) was added a solution glutathione **6** (0.47 mg, 1.5  $\mu\text{mol}$ ) in DMSO (4  $\mu\text{L}$ ) and DPAP (2  $\mu\text{L}$  of a 0.025 M solution in DMSO, 50.0 nmol). The mixture

was irradiated at r. t. for 10 min, then filtered twice by Ultrafree-MC microcentrifuge filter (nominal MW limit of 10,000 Da) for 10 min at 5,000 rpm to give **13**.

**Synthesis of 14.** To a solution of commercially available BSA (0.5 mg, 7.5 nmol) in 20 mM phosphate buffer at pH = 7.4 (125  $\mu$ L) was slowly added a solution of cyclooctyne **9** (0.1 mg, 64.0  $\mu$ mol) in DMSO (2  $\mu$ L). The mixture was placed in the end-over-end rotator during 10h and then filtered twice by Ultrafree-MC microcentrifuge filter (nominal MW limit of 10,000 Da) for 10 min at 5,000 rpm to give **14**.

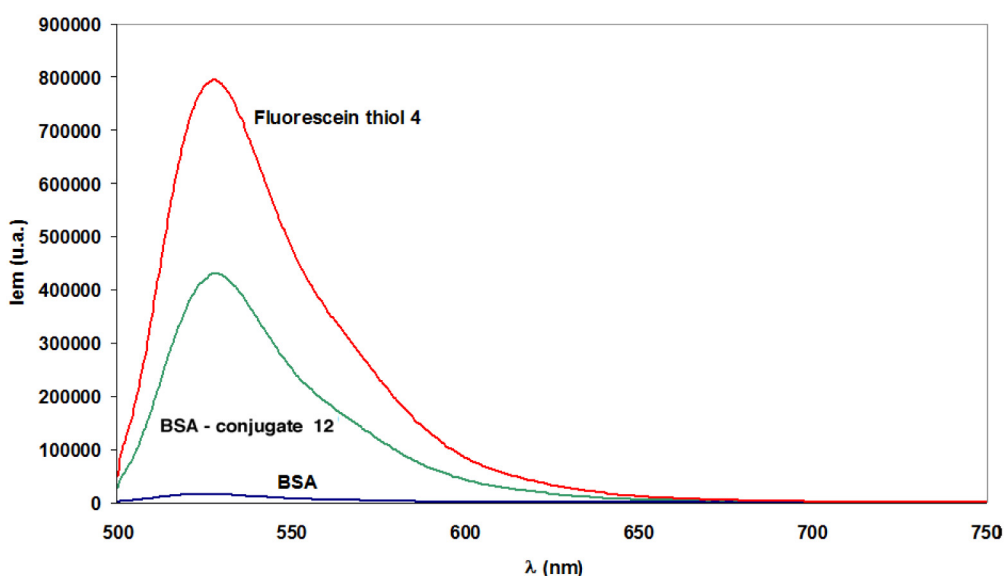

**Fig. S1** Fluorescence emission spectra ( $\lambda_{\text{ex}} = 490$  nm) of phosphate buffer solutions (pH 7.40) of BSA, BSA-conjugate **12**, and thiol **4**.

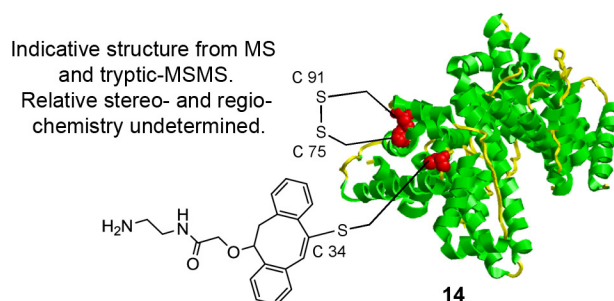

**Figure S2.** Structure of **14**.

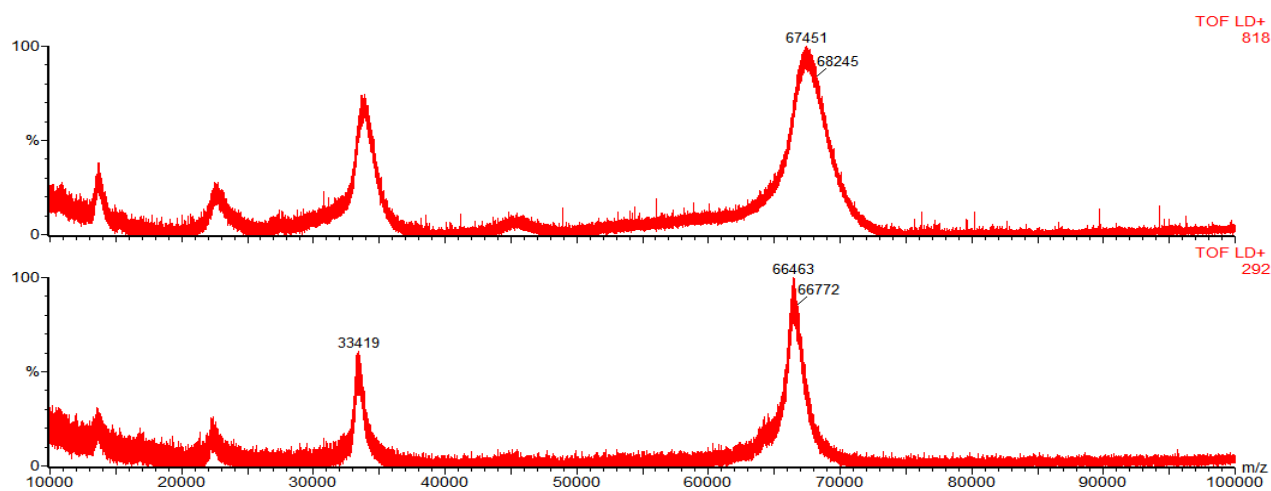

**Fig. S2.** MALDI-TOF MS spectra of BSA (bottom) and BSA-conjugate **11** (top).

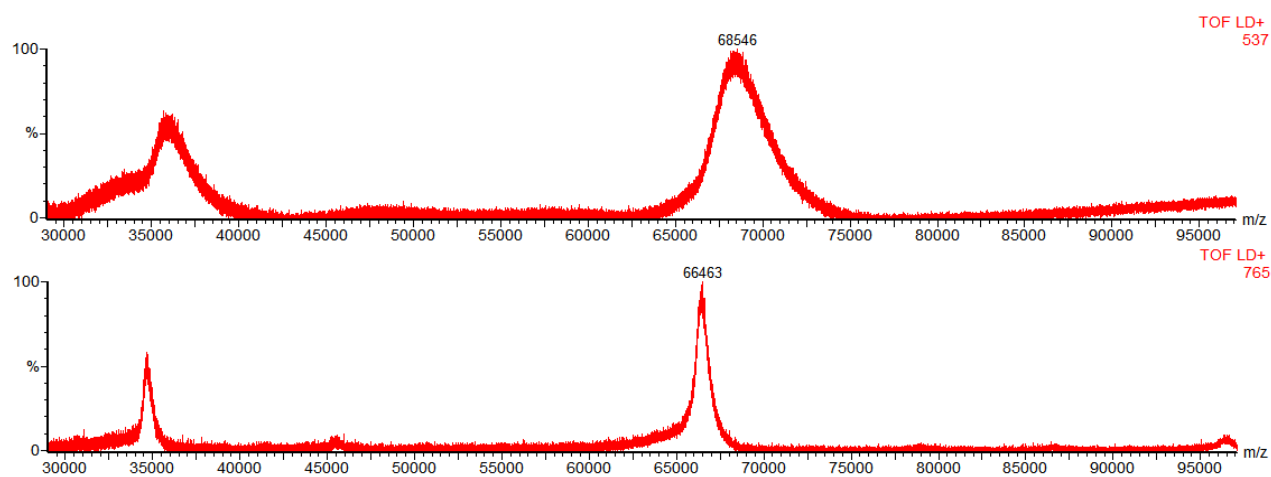

**Fig. S3.** MALDI-TOF MS spectra of BSA (bottom) and BSA-conjugate **12** (top).

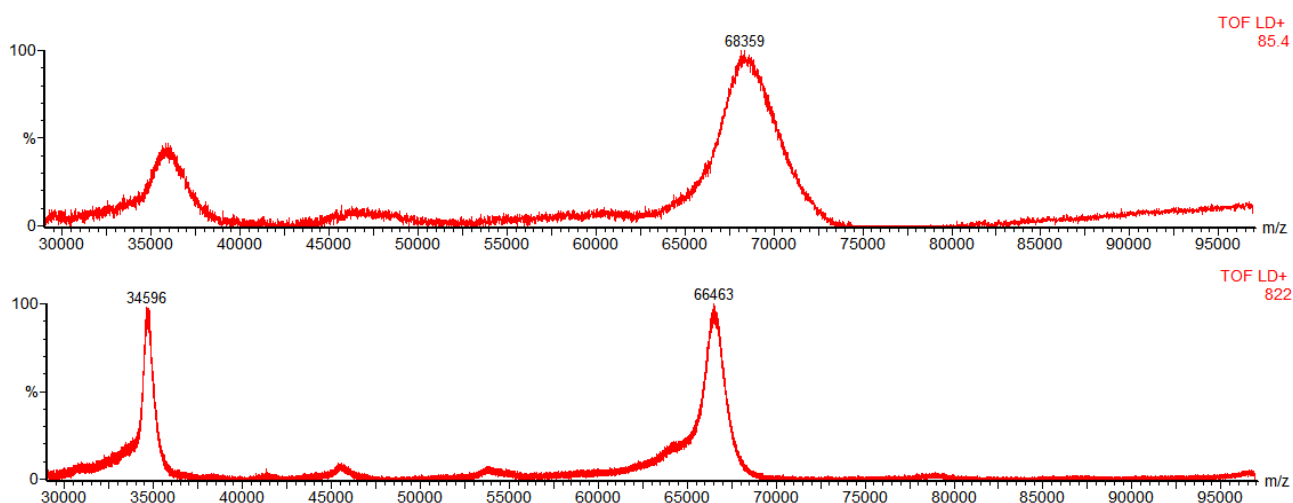

**Fig. S4.** MALDI-TOF MS spectra of BSA (bottom) and BSA-conjugate **13** (top).

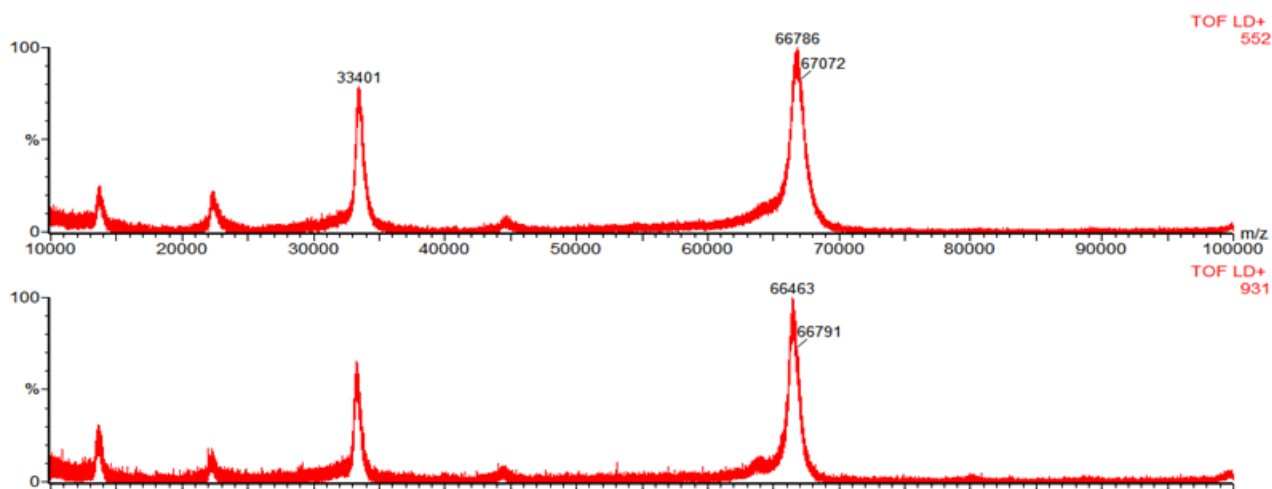

**Fig. S5.** MALDI-TOF MS spectra of BSA (bottom) and BSA-conjugate **14** (top).

### Tryptic digestion and LC ESI-QTOF MS analysis of derivatives **13** and **14** .

The enzymatic digestion of BSA derivatives **13** and **14** was performed by tryptic digestion of the samples without reduction of Cys-Cys disulfide bridges. A 100  $\mu$ L solution of each sample (**13** and **14**) at 50 ng/ $\mu$ L in 20 mM sodium phosphate buffer were incubated overnight (12 h) with shaking at 37 °C after addition of trypsin enzyme (Promega) for a ratio of 1/50 enzyme/protein (w/w).

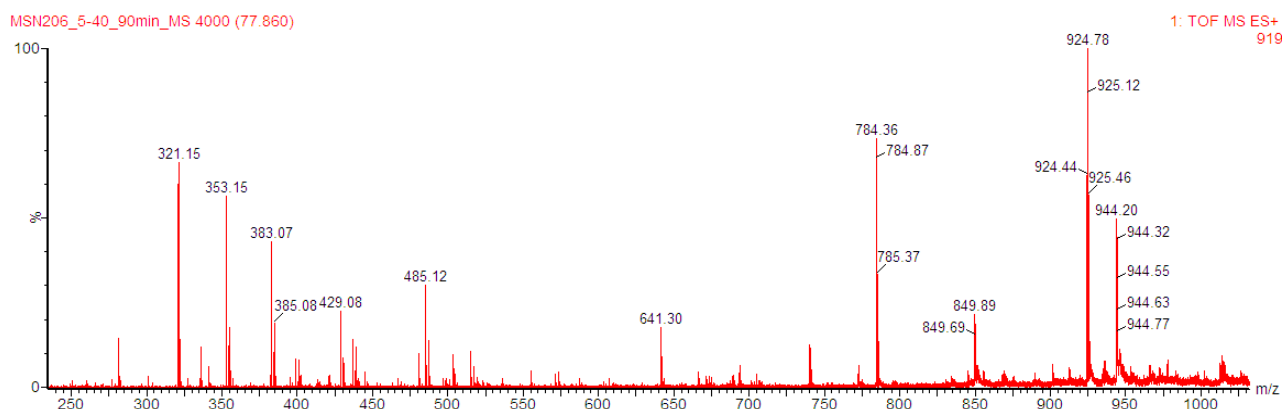

**Fig. S6.** ESI-QTOF MS spectrum of the peptide T5: 21GLVLIAFSQYLQQ[Cys-CyOct]-JPFDEH VK41 obtained by tryptic digestion of **14** and containing the modified Cys 34 (B= CysCyOct). m/z. Value of the triply charged peptide = 924.47.

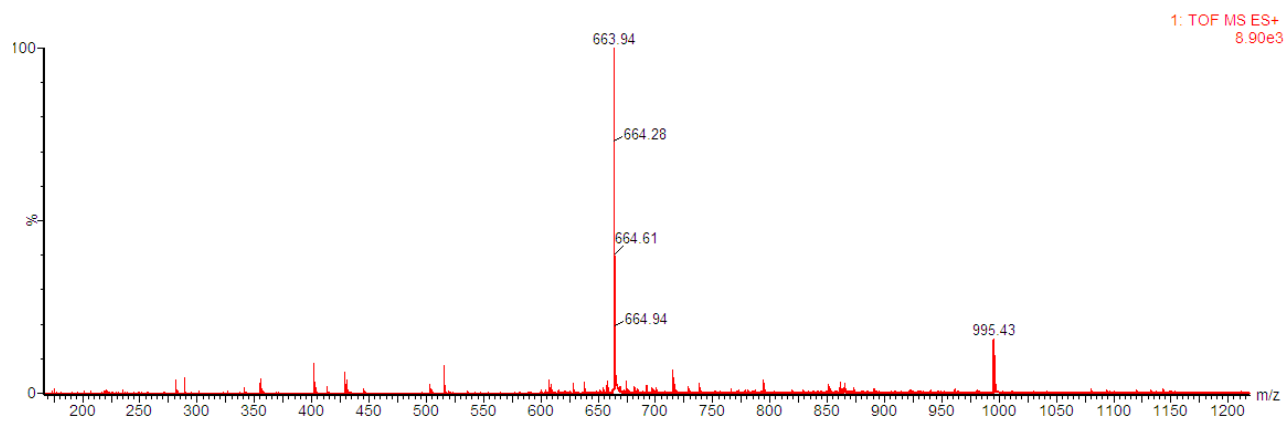

**Fig. S7.** ESI-QTOF MS spectrum of the peptide 65 SLHTLFGDEL[Cys-CyOct-GSH]K76 obtained by tryptic digestion of **13** and containing the modified Cys 75 (B= CysCyOct-GSH). m/z. Value of the doubly charged peptide: 663.97 and the triply charged peptide = 995.46.

**Table 1.** MS - Analysis of tryptic digestion of compounds **13** and **14**.

| Protein | Frag # | Res # | Sequence <sup>a</sup>                  | Calc. mass | Obs. mass | Charge <sup>b</sup> | Error (Δ) |
|---------|--------|-------|----------------------------------------|------------|-----------|---------------------|-----------|
| 13      | T8     | 65-76 | (K) SLHTLFGDEL[Cys-CyOct-GSH]K (V)     | 1988.90    | 995.97    | 2+                  | 0.03      |
| 13      | T8     | 65-76 | (K) SLHTLFGDEL[Cys-CyOct-GSH]K (V)     | 1988.90    | 663.47    | 3+                  | 0.05      |
| 14      | T5     | 21-41 | (K)GLVLIAFSQYLQQ[Cys-CyOct] PFDEHVK(L) | 2770.38    | 924.44    | 3+                  | 0.03      |

(a) Predicted peptide fragments containing [Cys-CyOct] and [Cys-CyOct-GSH] were determined by MassLynx software (v. 4.0 from Waters) according to the manufacturer's instructions. (b) Charge corresponding to [M+2H]<sup>2+</sup> or [M+3H]<sup>3+</sup>

|                |       |         |         |         |         |         |         |         |         |         |         |         |         |         |         |         |         |         |         |
|----------------|-------|---------|---------|---------|---------|---------|---------|---------|---------|---------|---------|---------|---------|---------|---------|---------|---------|---------|---------|
| a              | 30.03 | 143.12  | 242.19  | 355.27  | 468.35  | 539.39  | 686.46  | 773.49  | 901.55  | 1064.61 | 1177.70 | 1305.76 | 1433.82 | 1872.97 | 1970.03 | 2117.09 | 2232.12 | 2361.16 | 2498.22 |
| b <sup>+</sup> | 60.04 | 173.13  | 272.20  | 385.28  | 498.37  | 569.40  | 716.47  | 803.50  | 931.56  | 1094.63 | 1207.71 | 1335.77 | 1463.83 | 1902.98 | 2000.04 | 2147.10 | 2262.13 | 2391.17 | 2528.23 |
| c <sup>+</sup> | 74.05 | 187.13  | 286.20  | 399.28  | 512.37  | 583.41  | 730.47  | 817.51  | 945.56  | 1108.63 | 1221.71 | 1349.77 | 1477.83 | 1916.99 | 2014.04 | 2161.11 | 2276.13 | 2405.18 | 2542.24 |
| i              | 30.03 | 86.10   | 72.08   | 86.10   | 86.10   | 44.05   | 120.08  | 60.04   | 101.07  | 136.08  | 86.10   | 101.07  | 101.07  | 412.17  | 70.07   | 120.08  | 88.04   | 102.06  | 110.07  |
|                | 1     | 2       | 3       | 4       | 5       | 6       | 7       | 8       | 9       | 10      | 11      | 12      | 13      | 14      | 15      | 16      | 17      | 18      | 19      |
|                | Gly   | Leu     | Val     | Leu     | Ile     | Ala     | Phe     | Ser     | Gln     | Tyr     | Leu     | Gln     | Gln     | @       | Pro     | Phe     | Asp     | Glu     | His     |
|                | 21    | 20      | 19      | 18      | 17      | 16      | 15      | 14      | 13      | 12      | 11      | 10      | 9       | 8       | 7       | 6       | 5       | 4       | 3       |
| x              | -     | 2740.35 | 2627.26 | 2528.20 | 2415.11 | 2302.03 | 2230.99 | 2083.92 | 1996.89 | 1868.83 | 1705.77 | 1592.68 | 1464.63 | 1336.57 | 897.41  | 800.36  | 653.29  | 538.26  | 409.22  |
| y <sup>+</sup> | -     | 2714.37 | 2601.29 | 2502.22 | 2389.13 | 2276.05 | 2205.01 | 2057.94 | 1970.91 | 1842.85 | 1679.79 | 1566.71 | 1438.65 | 1310.59 | 871.43  | 774.38  | 627.31  | 512.28  | 383.24  |
| z <sup>+</sup> | -     | 2698.35 | 2585.27 | 2486.20 | 2373.11 | 2260.03 | 2188.99 | 2041.92 | 1954.89 | 1826.83 | 1663.77 | 1550.69 | 1422.63 | 1294.57 | 855.41  | 758.36  | 611.29  | 496.26  | 367.22  |



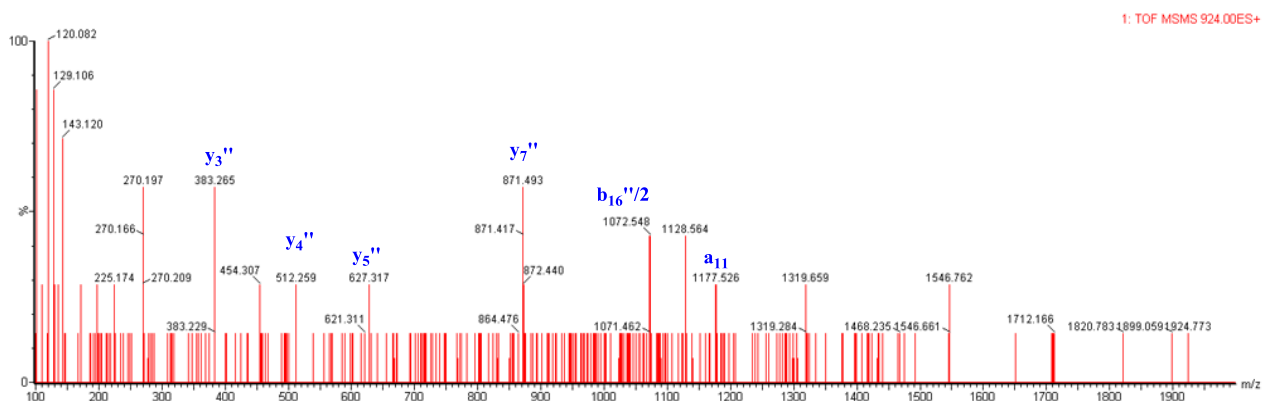

**Fig. S8.** ESI-QTOF MS-MS spectrum spectrum of the peptide T5: 21GLVLIAFSQYLQQ[Cys-CyOct]PFDEHVK41 obtained by tryptic digestion of **14** and containing the modified Cys 34 (B= CysCyOct. m/z. Value of the triply charged peptide = 924.47. The a'', b'', c', x, y'' and z' ion series of the fragments are reported.

## References

- 29 W. C. Still, M. Kahn and A. Mitra *J. Org. Chem.*, 1978, **43**, 2923-2925.
- 30 *Pure Appl. Chem.* 1991, **63**, 975-990.
- 31 J. C. Namyslo and C. Stanitzek, *Synthesis* 2006, 3367-3369.
- 32 E. Wingender and A. Arellano, *Anal. Biochem.*, 1982, **127**, 351-360.
- 33 R. J. Kaufman and R. S. Sidhu, *J. Org. Chem.*, 1982, **47**, 4941-4947.
